# Supplementary material for: Influence of particle orientation, concentration and matrix stiffness on the elastocaloric performance of spin crossover composite materials
Source: Royal Society of Chemistry journal article supplement (doi:10.1039/d5tc04047g), 2025-12-16
Supplement: d5tc04047g1.pdf [file d5tc04047g1.pdf]

## Supplementary Information

### Influence of Particle Orientation, Concentration and Matrix Stiffness on the Elastocaloric Performance of Spin Crossover Composite Materials

Nagham Mawassy, Adelais Trapali, Vincent Collière, Lionel Salmon, Gábor Molnár\* and Azzedine Bousseksou\*

LCC, CNRS & University of Toulouse, 205 route de Narbonne, 31077 Toulouse, France

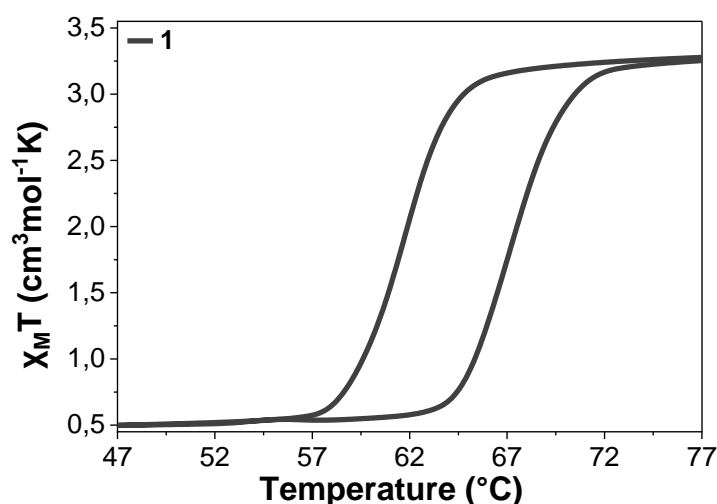

Figure S1: Temperature dependence of the molar magnetic susceptibility\*temperature product ( $\chi_M T$ ) for the SCO particles (1).

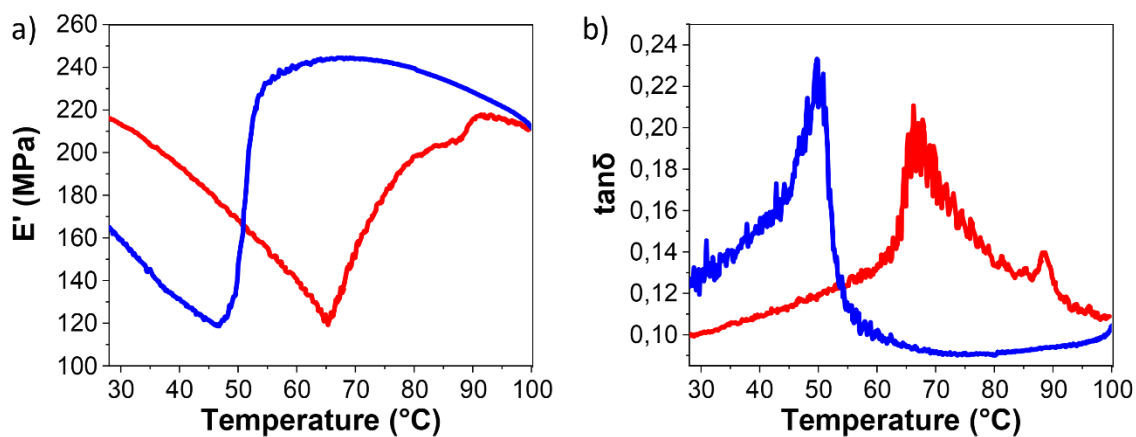

Figure S2: DMA characterization of 1@50%TPU70A'': a) Storage modulus and b) loss tangent measured as a function of the temperature upon heating (red) and cooling (blue).

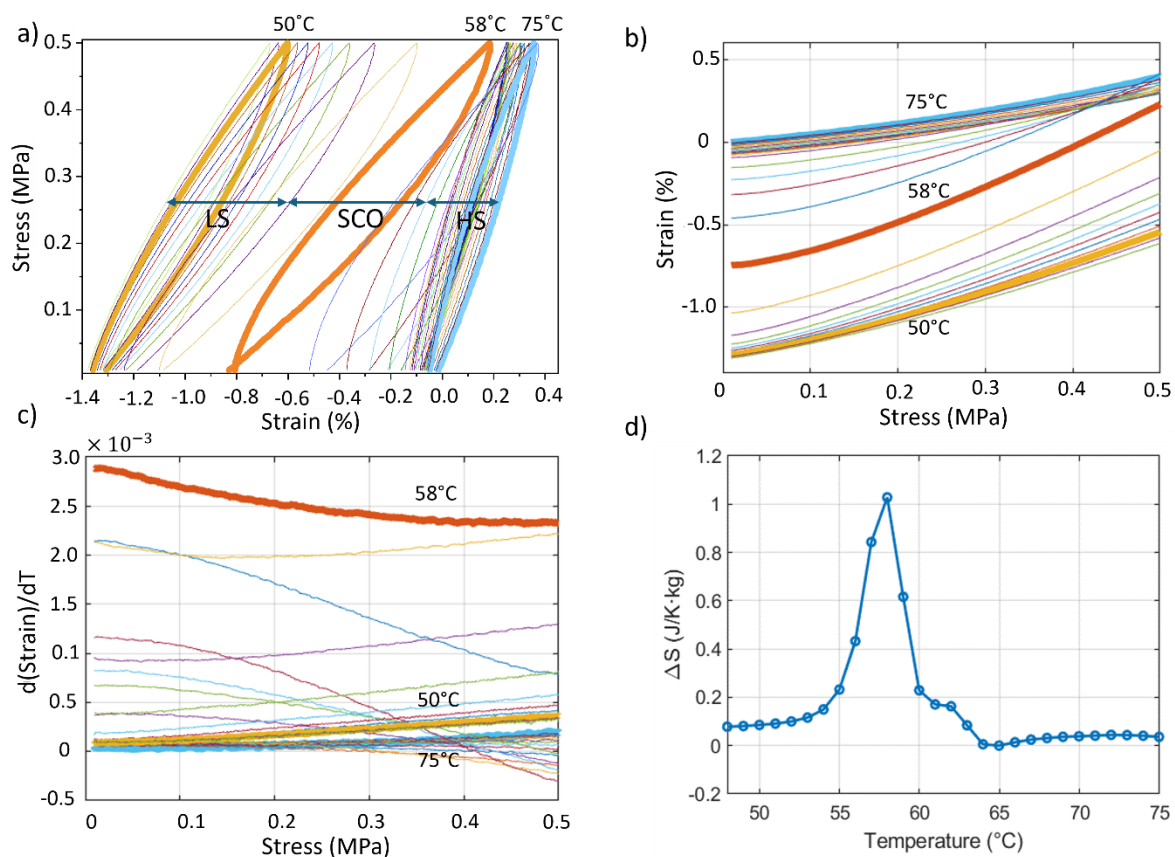

Figure S3: (a) Stress–strain curves under loading and unloading at various temperatures for the **1@50%TPU70A** sample. (b) Strain vs. stress curves corresponding to stretching in (a). (c) The differential of strain with respect to temperature vs. stress. (d) Entropy change ( $\Delta S$ ) induced by 0.5 MPa stress at isothermal conditions on the sample upon cooling.

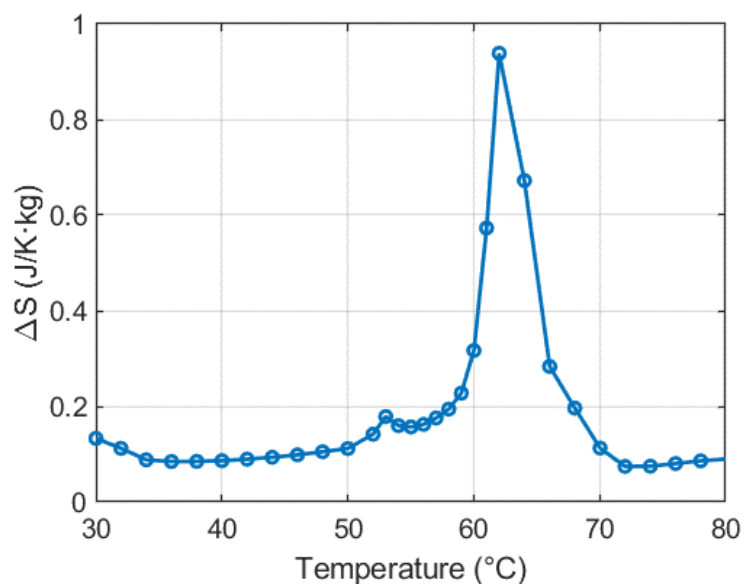

Figure S4: Entropy change induced by stress at isothermal conditions for the heating branch of **1@50%TPU70A** from 30 °C till 80 °C.

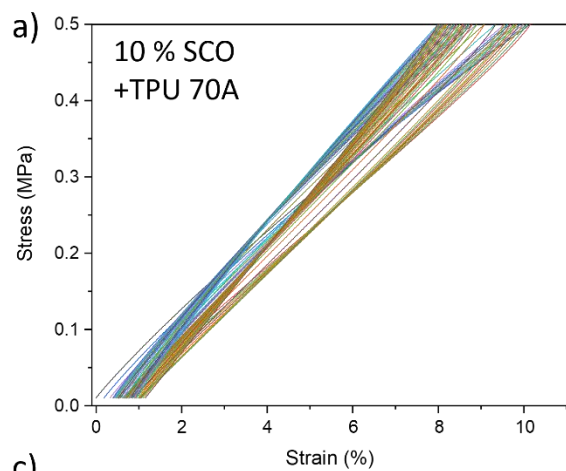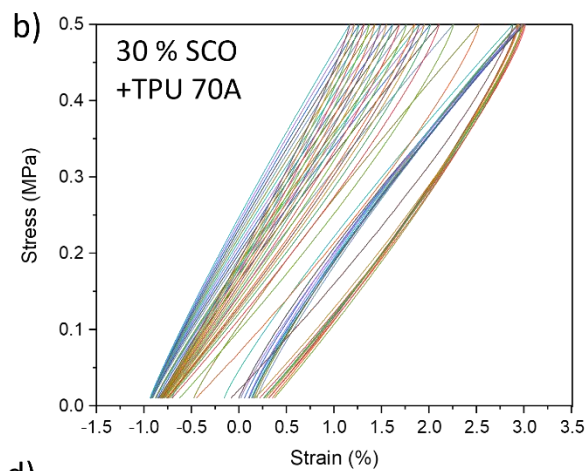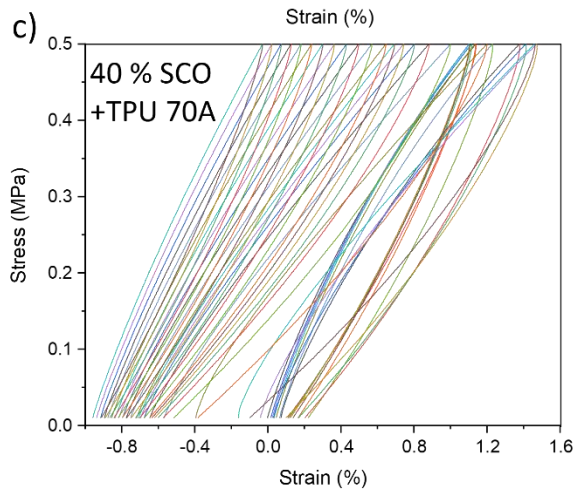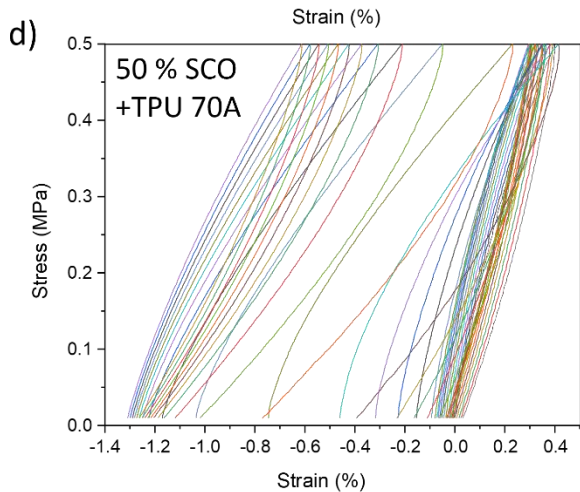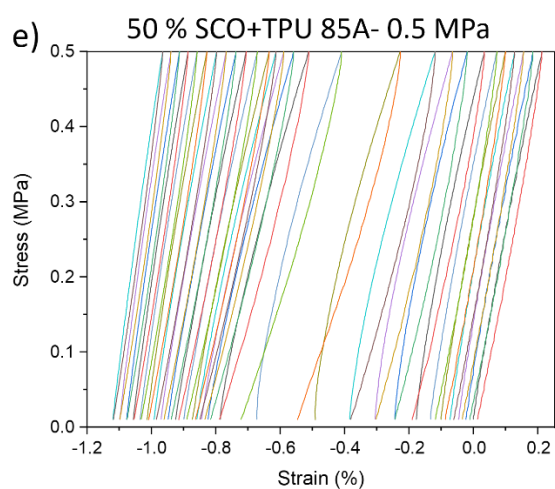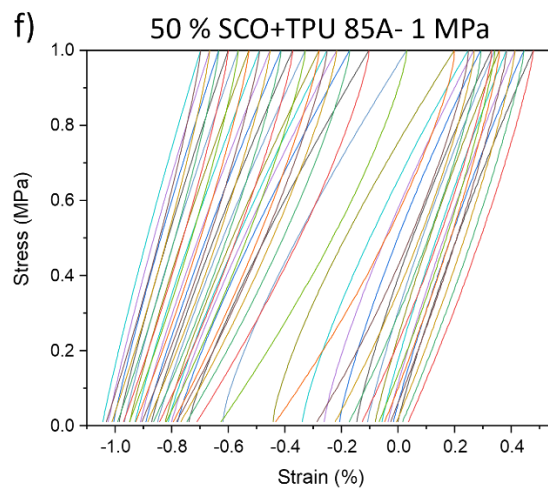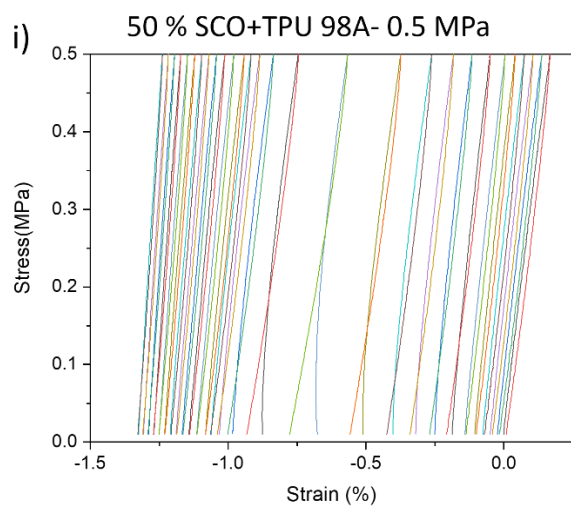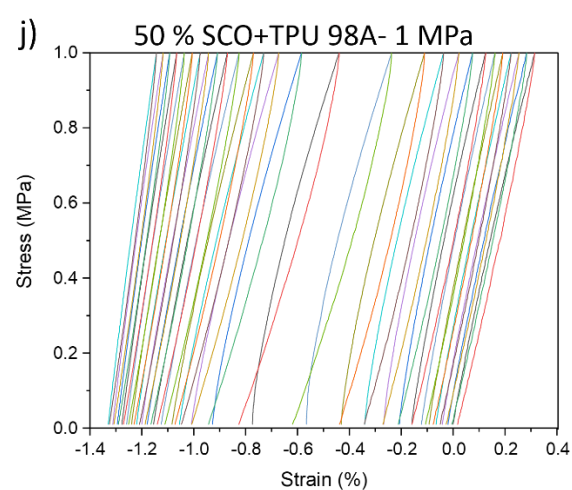

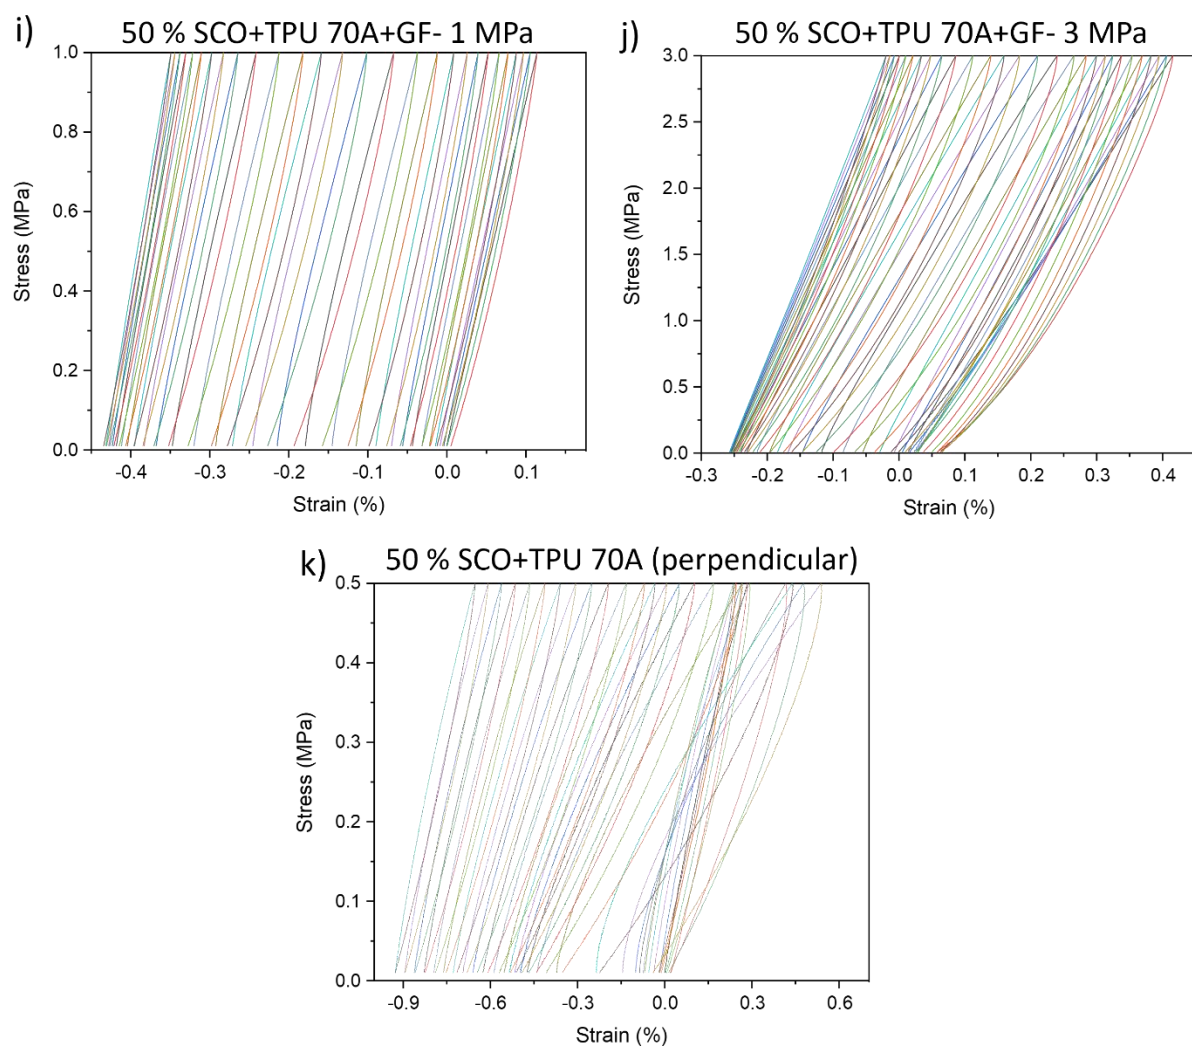

*Figure S5: Stress-strain curves of the different samples mentioned in Table 1 and Table 2 in the manuscript calculated with respect to the reference length at 75°C.*

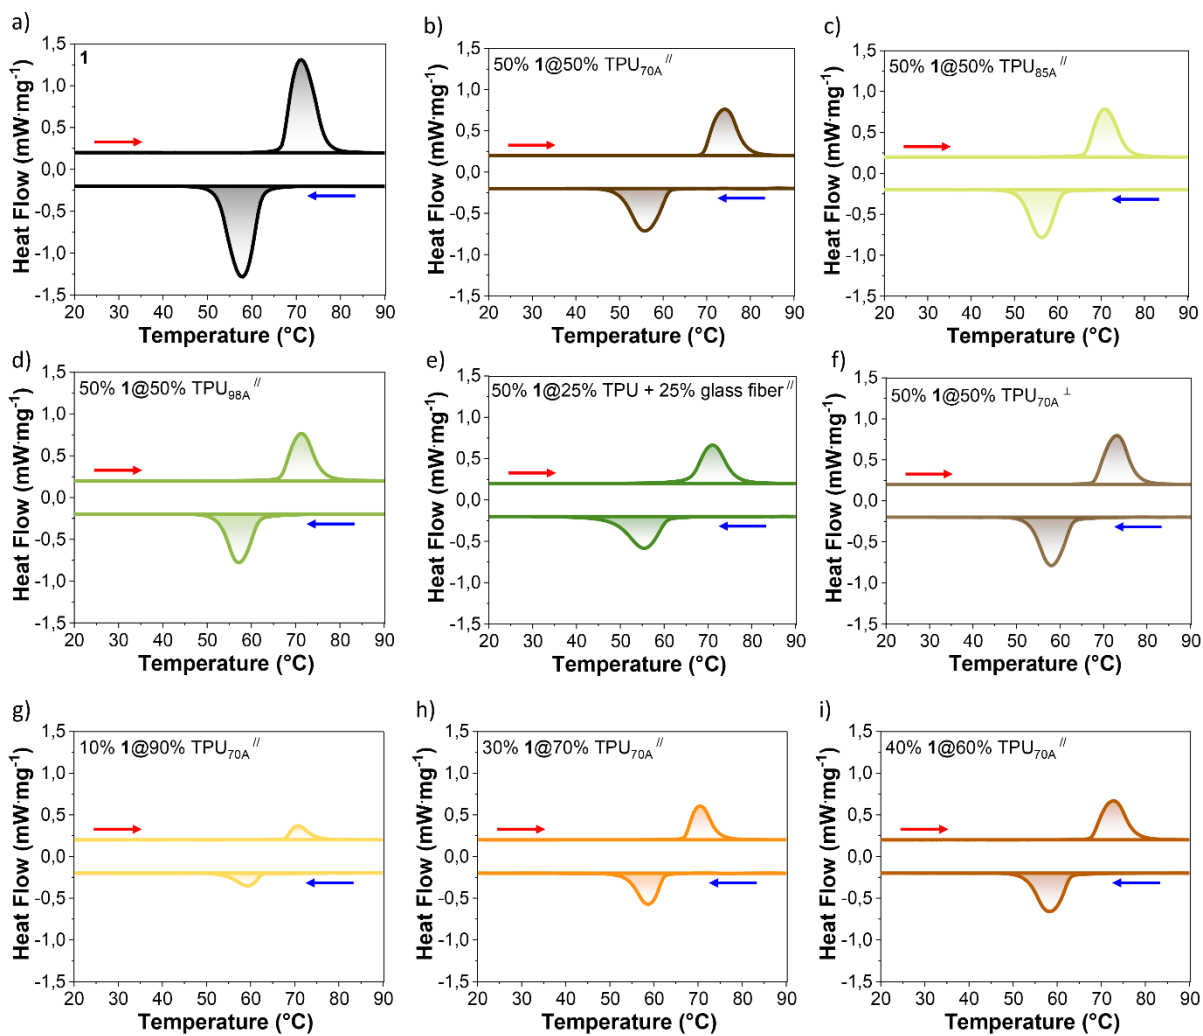

Figure S6: DSC curves of the different samples mentioned in Table 1 and Table 2 in the manuscript.
